# Supplementary material
Source: publisher figshare collection journal article supplement (https://gsajournals.figshare.com/ndownloader/files/18042932)
Supplement: Supplementary file 1 [file 18042932]

## Sheet: Table S2
TABLE S2: Lh 14 MSEV Proteins Are Not Highly Related to Viral Proteins
LbFV (3 results)
In-House Query Accesssion		Subject	Description	%ID	E-value	Quer Cov
GAJC01010619.1_3	LbFV	AQQ80003.1	hypothetical protein LbFV_ORF83 [Leptopilina boulardi filamentous virus]	27	0.001	39
	nr	XP_026479782.1	uncharacterized protein LOC113386201 [Ctenocephalides felis]	25.93	0.0002	72
GAJC01009336.1_20	LbFV	AQQ79980.1	putative lecithin:cholesterol acyltransferase [Leptopilina boulardi filamentous virus]	25	0.0009	39
	nr	XP_015108849.1	PREDICTED: asparagine synthetase [glutamine-hydrolyzing]-like [Diachasma alloeum]	69.12	0	99
GAJC01011893.1_31	LbFV	AQQ80007.1	hypothetical protein LbFV_ORF87 [Leptopilina boulardi filamentous virus]	31.25	3e-05	43
	nr	KMQ95331.1	cytochrome b5 [Lasius niger]	63.57	2e-53	92
PDV (4 results)
In-House Query Accesssion	Database	Subject	Description	% ID	E-value	Quer Cov
GAJC01027725.1_6	nr: PDV	YP_184862.1	hypothetical protein CcBV_23.4 [Cotesia congregata bracovirus]	31.088	1.38e-17	77
	nr	XP_004958409.1	ribonuclease 1 [Setaria italica]	26.068	1.14e-16	84
GAJC01013642.1_14	nr: PDV	AFN42311.1	cytochrome P450 [Cotesia sesamiae Mombasa bracovirus]	27.053	3.5e-37	72
	nr	NP_001165993.1	cytochrome P450 4G44 [Nasonia vitripennis]	71.3	0	99
GAJC01010919.1_17	nr: PDV	AFN42313.1	cytochrome P450 [Cotesia sesamiae Mombasa bracovirus]	22.558	1.23e-31	93
	nr	XP_012279668.1	cytochrome P450 4g15 [Orussus abietinus]	84.956	0	99
GAJC01003958.1_11	nr: PDV	AAV98010.1	hypothetical protein ORF3006 [Cotesia plutellae polydnavirus]	84.444	4.7e-52	89
	nr	OWK59279.1	Histone H4 [Lonchura striata domestica]	99.01	2.89e-63	100
Viridae (35 results)
In-House Query Accesssion	Database	Subject	Description	%ID	E-value	Query Cov
GAJC01013393.1_42	nr: Viridae	ARF08651.1	heat shock protein 83 kDa [Catovirus CTV1]	36.111	1.88e-65	88
	nr	KMQ97651.1	endoplasmin-like protein [Lasius niger]	77.473	0	100
GAJC01009190.1_6	nr: Viridae	AYV76070.1	hsp82-like protein [Terrestrivirus sp.]	58.871	1.14e-39	62
	nr	XP_015592342.1	endoplasmin [Cephus cinctus]	84.848	6.19e-109	100
GAJC01010930.1_14	nr: Viridae	YP_009213665.1	putative fructose-1,6-bisphosphate aldolase [Prochlorococcus phage P-TIM68]	52.557	1.44e-119	96
	nr	XP_011139291.1	fructose-bisphosphate aldolase isoform X1 [Harpegnathos saltator]	88.219	0	100
GAJC01012897.1_26	nr: Viridae	YP_009173627.1	Hsp70 protein [Chrysochromulina ericina virus]	70.936	0	92
	nr	XP_017757713.1	PREDICTED: heat shock 70 kDa protein cognate 4 isoform X1 [Eufriesea mexicana]	91.818	0	100
GAJC01012804.1_6	nr: Viridae	AYV75195.1	putative cytochrome b5 [Terrestrivirus sp.]	43.75	5.2e-22	56
	nr	XP_015509615.1	PREDICTED: cytochrome b5 [Neodiprion lecontei]	69.925	6.49e-64	94
GAJC01010280.1_48	nr: Viridae	AYV78014.1	elongation factor 1 alpha long form [Edafosvirus sp.]	43.29	1.53e-122	96
	nr	NP_001166227.1	elongation factor 1-alpha [Nasonia vitripennis]	97.609	0	100
GAJC01017322.1_30	nr: Viridae	AYV76711.1	hypothetical protein Terrestrivirus12_14 [Terrestrivirus sp.]	31.078	9.76e-50	46
	nr	XP_011330618.1	sarcalumenin isoform X2 [Ooceraea biroi]	63.412	0	99
GAJC01009288.1_7	nr: Viridae	NP_598374.1	ubiquitin-like protein [Murine osteosarcoma virus]	52.273	1.07e-30	98
	nr	OXU26385.1	hypothetical protein TSAR_013419 [Trichomalopsis sarcophagae]	79.389	3.38e-69	100
GAJC01011256.1_29	nr: Viridae	YP_007518064.1	peroxiredoxin [Pelagibacter phage HTVC008M]	46.903	9.39e-29	60
	nr	XP_015601491.1	peroxiredoxin-5, mitochondrial [Cephus cinctus]	77.901	1.78e-102	97
GAJC01011949.1_55	nr: Viridae	QBK91775.1	mitochondrial carrier-like protein [Pithovirus LCPAC304]	33.103	4.15e-44	95
	nr	XP_014220960.1	mitochondrial 2-oxoglutarate/malate carrier protein-like [Trichogramma pretiosum]	90.278	0	98
GAJC01013642.1_14	nr: Viridae	AFN42311.1	cytochrome P450 [Cotesia sesamiae Mombasa bracovirus]	27.053	9.08e-34	72
	nr	OXU28285.1	hypothetical protein TSAR_003383 [Trichomalopsis sarcophagae]	71.3	0	99
GAJC01013073.1_33	nr: Viridae	1604248A	J1 Protein (Moloney murine leukemia virus)	76.923	0	97
	nr	XP_017888099.1	60S ribosomal protein L3 [Ceratina calcarata]	93.689	0	100
GAJC01009958.1_42	nr: Viridae	QBK91702.1	histone 2A-domain-containing protein [Pithovirus LCPAC304]	45.631	1.15e-24	81
	nr	KZC06774.1	Histone H2A.V, partial [Dufourea novaeangliae]	100	5.4e-80	100
GAJC01029718.1_61	nr: Viridae	AYV78414.1	putative ras-related protein Rab-10-like protein [Edafosvirus sp.]	48.37	1.05e-63	81
	nr	XP_015123539.1	PREDICTED: ras-related protein Rab-3 isoform X2 [Diachasma alloeum]	94.57	7.07e-155	100
GAJC01011832.1_33	nr: Viridae	AYV75487.1	GTP-binding protein YPTC1 [Terrestrivirus sp.]	67.647	5.91e-80	80
	nr	XP_001607208.1	PREDICTED: ras-related protein Rab-1A [Nasonia vitripennis]	90.952	1.87e-143	100
GAJC01009336.1_20	nr: Viridae	AYV84840.1	asparagine synthase (glutamine-hydrolysing) [Hyperionvirus sp.]	42.087	9.61e-139	99
	nr	XP_015108849.1	PREDICTED: asparagine synthetase [glutamine-hydrolyzing]-like [Diachasma alloeum]	69.12	0	99
GAJC01009776.1_111	nr: Viridae	AGE57609.1	calcium-transporting ATPase, plasma membrane-type [Acanthocystis turfacea Chlorella virus NTS-1]	29.114	1.37e-81	83
	nr	XP_018058981.1	PREDICTED: sodium/potassium-transporting ATPase subunit alpha isoform X5 [Atta colombica]	96.226	0	100
GAJC01009624.1_17	nr: Viridae	YP_009221129.1	hypothetical protein AV955_gp109 [Diadromus pulchellus ascovirus 4a]	51.579	3.3e-104	79
	nr	XP_011637428.1	acyl-CoA Delta(11) desaturase-like [Pogonomyrmex barbatus]	76.353	0	99
GAJC01028364.1_66	nr: Viridae	YP_004061441.1	hypothetical protein BpV1_011c [Bathycoccus sp. RCC1105 virus BpV1].	41.412	1.33e-119	63
	nr	XP_014470355.1	PREDICTED: AFG3-like protein 2 [Dinoponera quadriceps]	68.642	0	99
GAJC01010919.1_17	nr: Viridae	AFN42313.1	cytochrome P450 [Cotesia sesamiae Mombasa bracovirus]	22.558	2.22e-28	94
	nr	XP_012279668.1	cytochrome P450 4g15 [Orussus abietinus]	84.956	0	100
GAJC01012692.1_68	nr: Viridae	QBK87831.1	Hsp70 protein [Marseillevirus LCMAC202]	63.366	0	92
	nr	XP_015112461.1	PREDICTED: heat shock 70 kDa protein cognate 3 [Diachasma alloeum]	92.683	0	100
GAJC01012771.1_15	nr: Viridae	AYV80407.1	glutamine synthetase [Harvfovirus sp.]	52.632	4.6e-116	90
	nr	XP_008558400.1	PREDICTED: glutamine synthetase 2 cytoplasmic isoform X1 [Microplitis demolitor]	86.957	0	100
GAJC01012526.1_17	nr: Viridae	AYV76018.1	processing protease [Terrestrivirus sp.]	26.699	9.12e-36	79
	nr	XP_011172112.1	mitochondrial-processing peptidase subunit beta [Solenopsis invicta]	76.891	0	100
GAJC01011927.1_54	nr: Viridae	QBK89261.1	DEAD/SNF2-like helicase [Mimivirus LCMiAC02]	39.594	1.05e-87	82
	nr	XP_011501061.1	PREDICTED: putative ATP-dependent RNA helicase me31b [Ceratosolen solmsi marchali]	95.034	0	100
GAJC01012412.1_24	nr: Viridae	CAA25063.1	unnamed protein product [Feline sarcoma virus]	64.706	8.52e-87	58
	nr	QBB01857.1	beta-actin, partial [Cotesia chilonis]	100	0	100
GAJC01009315.1_44	nr: Viridae	YP_009213701.1	putative zinc-containing alcohol dehydrogenase superfamily protein [Prochlorococcus phage P-TIM68]	28.184	1.22e-31	96
	nr	XP_015589544.1	alcohol dehydrogenase class-3 [Cephus cinctus]	84.043	0	100
GAJC01011558.1_41	nr: Viridae	ASD51141.1	putative dihydrolipoamide dehydrogenase [Erysipelothrix phage phi1605]	27.826	5.52e-51	89
	nr	XP_015521697.1	PREDICTED: dihydrolipoyl dehydrogenase, mitochondrial [Neodiprion lecontei]	87.179	0	100
GAJC01010126.1_52	nr: Viridae	AYV82031.1	Ras-like protein Rab-11A [Homavirus sp.]	62.679	7.74e-91	96
	nr	XP_014600829.1	PREDICTED: ras-related protein Rab-11A [Polistes canadensis]	100	2.01e-158	100
GAJC01013185.1_14	nr: Viridae	AQM32732.1	thermosome, partial [uncultured virus]	27.866	2.37e-48	95
	nr	XP_003488200.1	T-complex protein 1 subunit zeta [Bombus impatiens]	85.283	0	100
GAJC01012411.1_49	nr: Viridae	CAA25063.1	unnamed protein product [Feline sarcoma virus]	62.602	2.66e-85	62
	nr	XP_014603494.1	PREDICTED: actin, muscle [Polistes canadensis]	100	0	100
GAJC01012240.1_36	nr: Viridae	QBK88455.1	AMP-binding enzyme [Mimivirus LCMiAC01]	35.738	9.3e-111	84
	nr	XP_008544493.1	PREDICTED: very long-chain-fatty-acid--CoA ligase bubblegum-like isoform X1 [Microplitis demolitor]	73.547	0	100
GAJC01010424.1_32	nr: Viridae	AGE51234.1	calcium-transporting ATPase, plasma membrane-type [Paramecium bursaria Chlorella virus CVG-1]	29.126	2.47e-89	82
	nr	XP_012227425.1	PREDICTED: calcium-transporting ATPase sarcoplasmic/endoplasmic reticulum type isoform X2 [Linepithema humile]	94.79	0	99
GAJC01027725.1_6	nr: Viridae	AUL79063.1	T2 family ribonuclease [Tupanvirus deep ocean]	34.021	8.42e-22	86
	nr	XP_012271266.1	ribonuclease Oy [Orussus abietinus]	36.638	2.69e-43	96
GAJC01030130.1_52	nr: Viridae	AXU41563.1	EGT [Mythimna unipuncta nucleopolyhedrovirus]	25.866	2.08e-53	90
	nr	XP_012215174.1	PREDICTED: UDP-glucuronosyltransferase-like [Linepithema humile]	51.145	0	98
GAJC01011881.1_45	nr: Viridae	AQM32696.1	chaperonin GroEL [uncultured virus]	52.7	1.06e-178	94
	nr	XP_011340338.1	heat shock protein 60A [Ooceraea biroi]	90.328	0	96
Table S2: Lh 14 MSEV Proteins Are Not Highly Related to Viral Proteins. Lh MSEV superset proteins were searched for similarities to LbFV proteins via BLASTp. They were also searched against the entire PDV nr database and Viridae nr database via BLASTp. Results from an unrestricted nr BLASTp search score better than any alignment obtained from LbFV, PDV nr, and Viridae nr.
